# Supplementary material
Source: Springer Nature journal article supplement (https://www.springermedizin.de/resource/supplementary/12893_2013_375_MOESM1_ESM.pdf/9512106)
Supplement: MOESM1 [file 9512106]

387 patients

excluded:

29 patients:

other malignancy

10 patients:

short term radiation

16 patients:

conventional neoadjuvant RCT

8 patients:

inRCT not completed

3 patients:

complications during inRCT

106 patients  
inRCT

215 patients

**matching 1:1**

decreasing preference by tumor height, discontinuous resection/exstirpation,  
T-category of the TNM-system, diverting stoma and UICC stage

surgery

106 patients

surgery

recording of complications
